# Supplementary material for: Formation of high crystalline ZIF-8 in an aqueous solution
Source: Royal Society of Chemistry journal article supplement (doi:10.1039/c2ce26847g), 2012-12-21
Supplement: c2ce26847g.pdf [file c2ce26847g.pdf]

## Formation of high crystalline ZIF-8 in an aqueous solution

Koji Kida,<sup>a</sup> Muneyuki Okita,<sup>a</sup> Kosuke Fujita,<sup>a</sup> Shunsuke Tanaka,<sup>a,b†</sup> and Yoshikazu Miyake<sup>a,b</sup>

<sup>a</sup>Department of Chemical, Energy and Environmental Engineering, Faculty of Environmental and Urban Engineering, Kansai University, 3-3-35 Yamate-cho, Suita-shi, Osaka 564-8680 JAPAN

<sup>b</sup>Organization for Research and Development of Innovative Science and Technology (ORDIST), Kansai University, 3-3-35 Yamate-cho, Suita-shi, Osaka 564-8680 JAPAN

† Tel: +81-6-6368-0851; Fax: +81-6-6388-8869; E-mail: shun\_tnk@kansai-u.ac.jp (S. Tanaka)

### Supplementary Material (ESI) for CrystEngComm

#### Contents

|                                                     | <b>Page</b> |
|-----------------------------------------------------|-------------|
| <b>Figure SI1 TGA curves</b>                        | <b>S2</b>   |
| <b>Figure SI2 Photographs of synthesis solution</b> | <b>S2</b>   |
| <b>Figure SI3 PXRD patterns of the products</b>     | <b>S3</b>   |

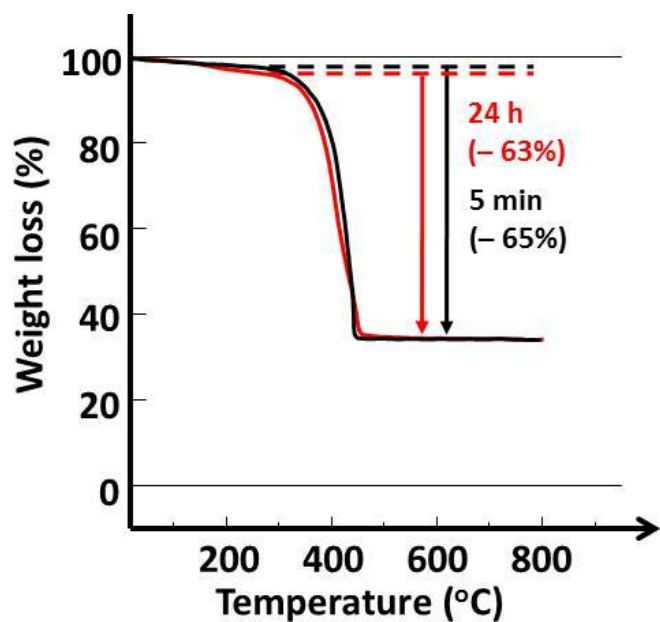

Figure S1 TGA curves of ZIF-8 prepared at 5 min and 24 h.

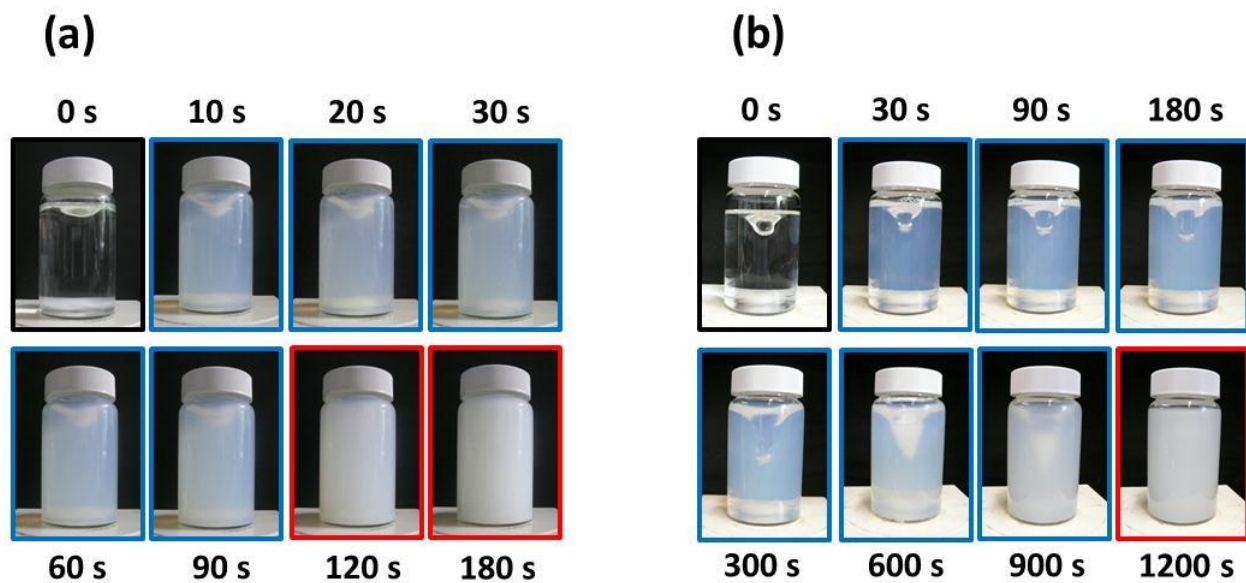

Figure S2 Photographs of synthesis solution as a function of synthesis time. (a) Hmim/Zn molar ratio of 60 and (b) Hmim/Zn molar ratio of 20.

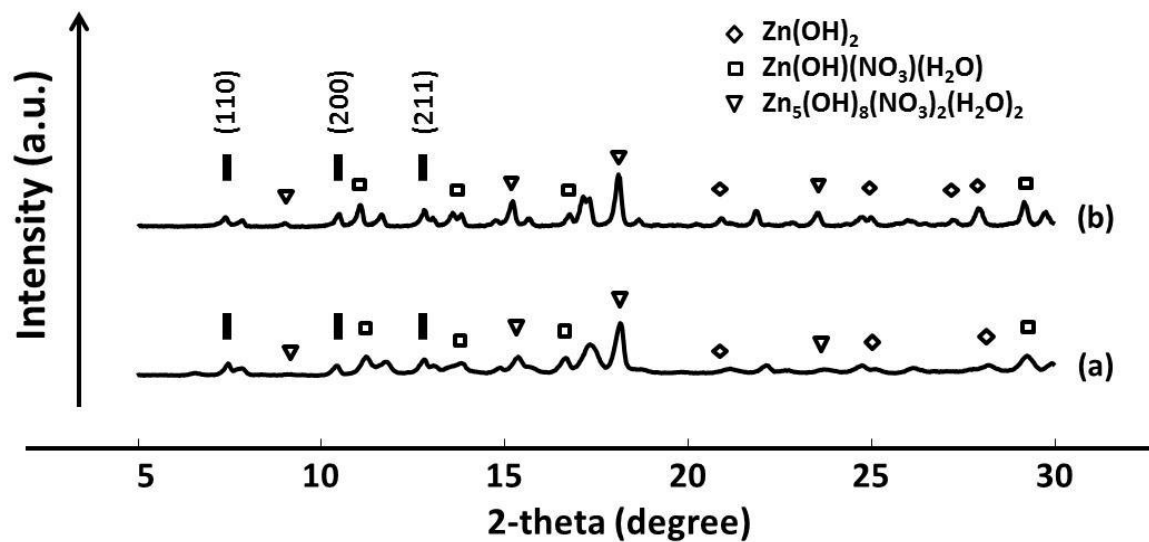

**Figure S3** PXR D patterns of the products prepared at the Hmim/Zn molar ratio of 20 (24 h). The synthesis solution (a) with pH control (pH = 9.11) and (b) without pH control.
